# Supplementary material
Source: PubMed Central journal article supplement (PMC3320204)
Supplement: supp_pp.111.191262_70118Supplemental_Figure_S2.pdf [file supp_pp.111.191262_70118Supplemental_Figure_S2.pdf]

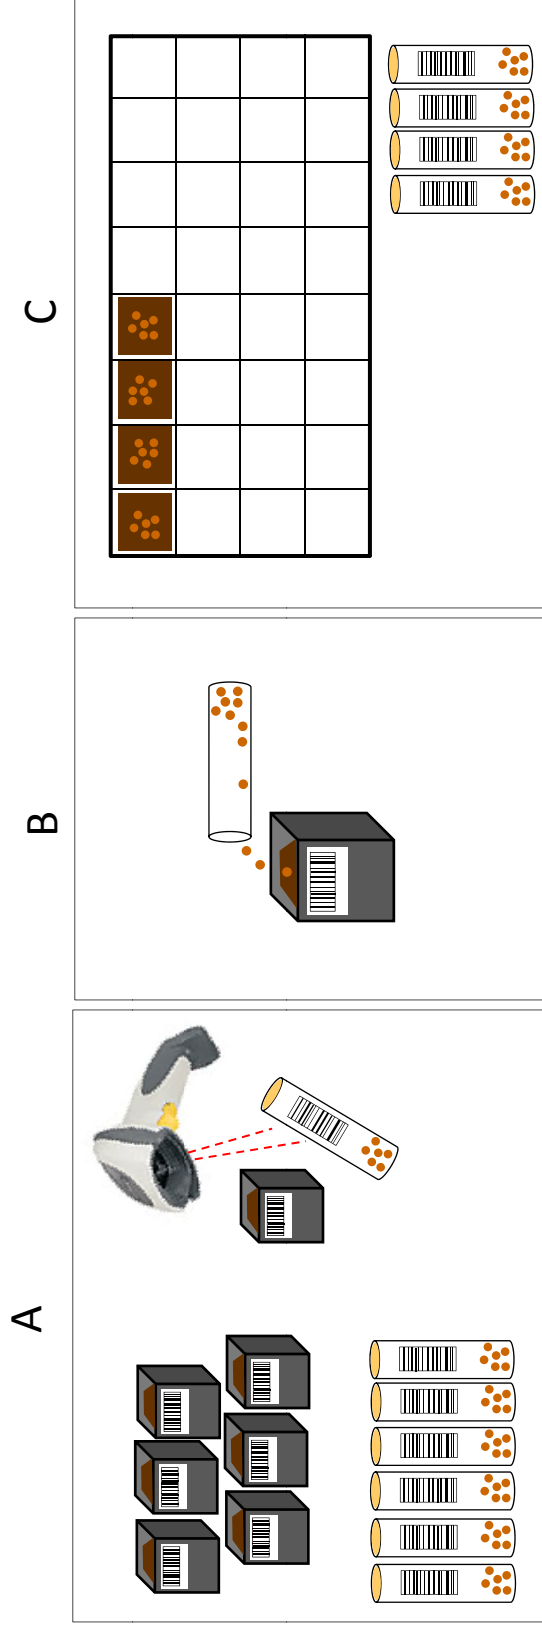

**Supplemental Figure S2.** Schematic representation of how the laboratory information management system and laboratory work space are used to reduce error.

This example shows the steps involved in planting seeds to individual pots; see Figure 2 for the LIMS display used in this laboratory procedure. **A**, Unplanted pots are held in a waiting flat, and seed tubes not yet entered into the database are in the same area. Barcodes on a seed tube and an empty pot are scanned to establish an association between the two samples in the database. **B**, The scanned seed vial and pot are moved together to a different area, where the planting occurs. **C**, Once the seed is planted, the pot is moved to the barcoded flat, and the seed stock is moved to a separate rack containing stocks already planted.
