# Supplementary material
Source: PubMed Central journal article supplement (PMC3320204)
Supplement: supp_pp.111.191262_191262Fig_S1_P4_and_PI-II_in_jai1-1.pdf [file supp_pp.111.191262_191262Fig_S1_P4_and_PI-II_in_jai1-1.pdf]

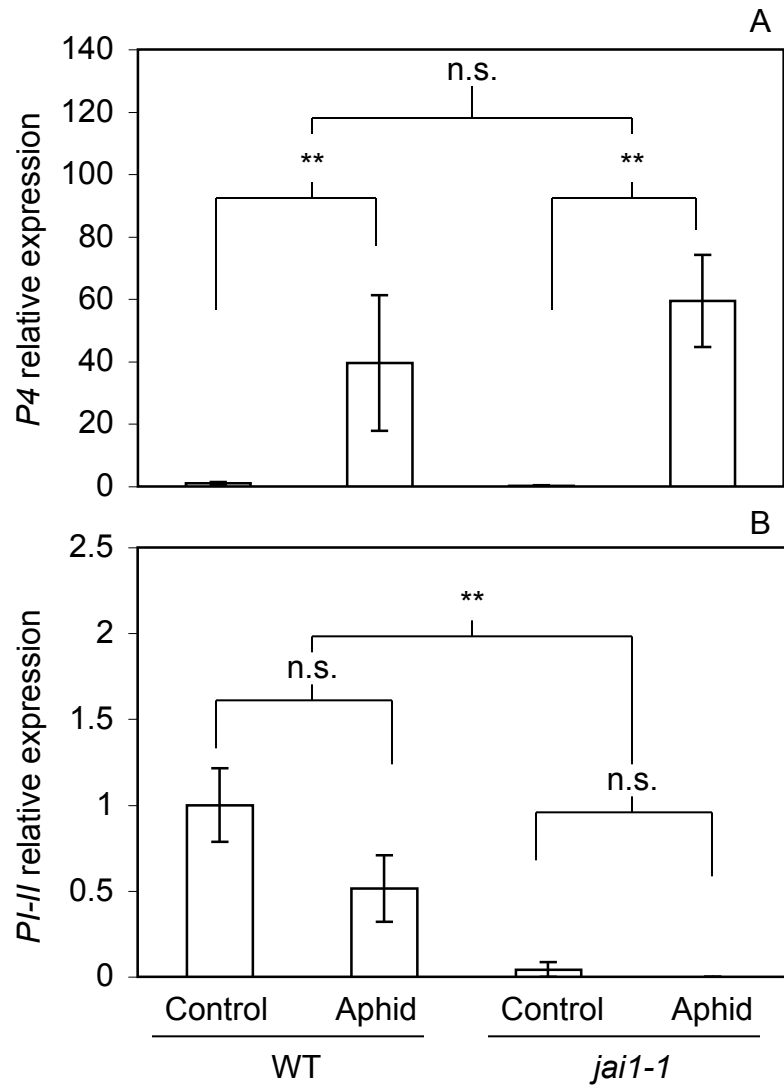

**Figure S1. Loss of jasmonic acid sensitivity in *jai1-1* mutant does not enhance expression of SA-responsive gene *P4* (A), but suppresses expression of the JA-responsive gene *PI-II* (B).** WT (cv. Castlemart) and *jai1-1* tomato plants were challenged with the potato aphid or mock-inoculated with empty cages, and *P4* and *PI-II* transcript abundance was analyzed 48 hrs after inoculation. Expression values were calculated by RT-qPCR relative to the WT mock-inoculated control, normalized using the *RPL2* gene, and analyzed by two-way ANOVA. Error bars represent  $\pm$ SEM (N=4). \*\*= indicates  $P < 0.0001$ , and n.s.= no significant difference at  $\alpha = 0.05$ .
