# Supplementary material
Source: PubMed Central journal article supplement (PMC3320204)
Supplement: supp_pp.111.191262_191262Fig_S2_Catechol.pdf [file supp_pp.111.191262_191262Fig_S2_Catechol.pdf]

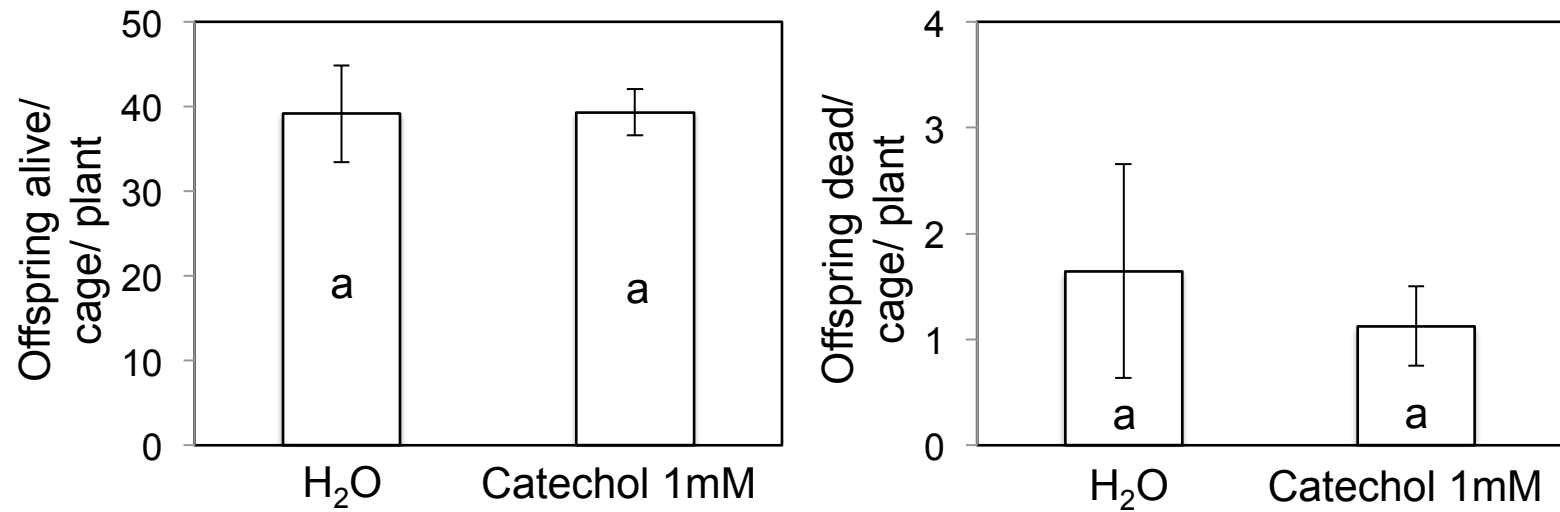

**Figure S2. Effect of catechol on aphid performance.** One-month-old *spr2* tomato mutant plants were infiltrated with catechol (1mM) or water as no-treatment control using a needleless syringe. Seven plants per treatment were inoculated with 4 adult aphids/cage (2 cages/plant). After 6 days the offspring/ plant was counted. Bars ( $\pm$  SEM) having different letter are statistically different at  $\alpha=0.05$ .
